# Supplementary material for: Targeting of a Conserved Epitope in Mouse and Human GPVI Differently Affects Receptor Function
Source: MDPI journal article supplement (doi:10.3390/ijms23158610), 2022-08-03
Supplement: s1 [file s1]

## Online Supplement

# Targeting of a conserved epitope in mouse and human GPVI differently affects receptor function

Stefano Navarro <sup>1,2</sup>, Andreas Starke<sup>1</sup>, Johan W.M. Heemskerk <sup>2,3</sup>, Marijke J. E. Kuijpers <sup>2,4</sup>, David Stegner <sup>1</sup>, Bernhard Nieswandt <sup>1,\*</sup>

- 1 Institute of Experimental Biomedicine, University Hospital Würzburg and Rudolf Virchow Center for Integrative and Translational Bioimaging, Josef-Schneider-Straße 2, 97080 Würzburg, Germany.
  - 2 Department of Biochemistry, Cardiovascular Research Institute Maastricht (CARIM), Maastricht Uni-versity, 6229 ER Maastricht, The Netherlands
  - 3 Synapse Research Institute, Kon. Emmaplein 7, 6214 AC Maastricht, The Netherlands.
  - 4 Thrombosis Expertise Center, Heart and Vascular Center, Maastricht University Medical Center+, Maastricht, Professor Debyelaan 25, 6229HX Maastricht, The Netherlands. Tel. +31-43-3881674.
- \*Correspondence: bernhard.nieswandt@virchow.uni-wuerzburg.de

| Parameter                                       | Wild-type   | hGP6 <sup>tg/tg</sup> | TTEST |
|-------------------------------------------------|-------------|-----------------------|-------|
| Platelet count 10 <sup>3</sup> /mm <sup>3</sup> | 1084 ± 78   | 1212.75 ± 86.01       | ns    |
| Platelet Size (fl)                              | 5.75 ± 0.21 | 5.8 ± 0.16            | ns    |

**Suppl. Table S1. Platelet count and size.** EDTA-treated blood was measured with an automated cell counter (ScilVet). Experiments shown are representative of n=5. Flow cytometry data are expressed as means ± SD.

| Glycoprotein | Wild-type (MFI)  | hGP6 <sup>tg/tg</sup> (MFI) | TTEST |
|--------------|------------------|-----------------------------|-------|
| GPIb         | 6337 ± 94.9      | 6209 ± 207.1                | ns    |
| GPIIbβ       | 13072.5 ± 523.7  | 13421 ± 909.1               | ns    |
| αIIbβ3       | 15043.5 ± 475.3  | 15740 ± 382.8               | ns    |
| α2β1         | 1570.25 ± 67.3   | 1530.25 ± 22.3              | ns    |
| α5β1         | 1038 ± 69.6      | 1031 ± 44.9                 | ns    |
| GPIX         | 8257 ± 228.1     | 8336.75 ± 164               | ns    |
| β3           | 8590 ± 639.2     | 8065.75 ± 212.5             | ns    |
| GPV          | 8140.25 ± 184.5  | 8366 ± 117.3                | ns    |
| CD9          | 38258.5 ± 335.65 | 37954.5 ± 476.6             | ns    |
| mGPVI        | 790.5 ± 19.18    | 86.43 ± 19.19               | ***   |
| huGPVI       | 223.5 ± 15.55    | 838.75 ± 32.81              | ***   |

**Suppl. Table S2. Flow cytometric analysis of platelet glycoprotein expression.** The expression levels of platelet glycoproteins were determined by flow cytometry. Experiments shown are representative of n=5. Data are expressed as means ± SD, significance is expressed as \* p < 0.05, \*\* p < 0.01, \*\*\* p < 0.001 vs. indicated group (t-test).

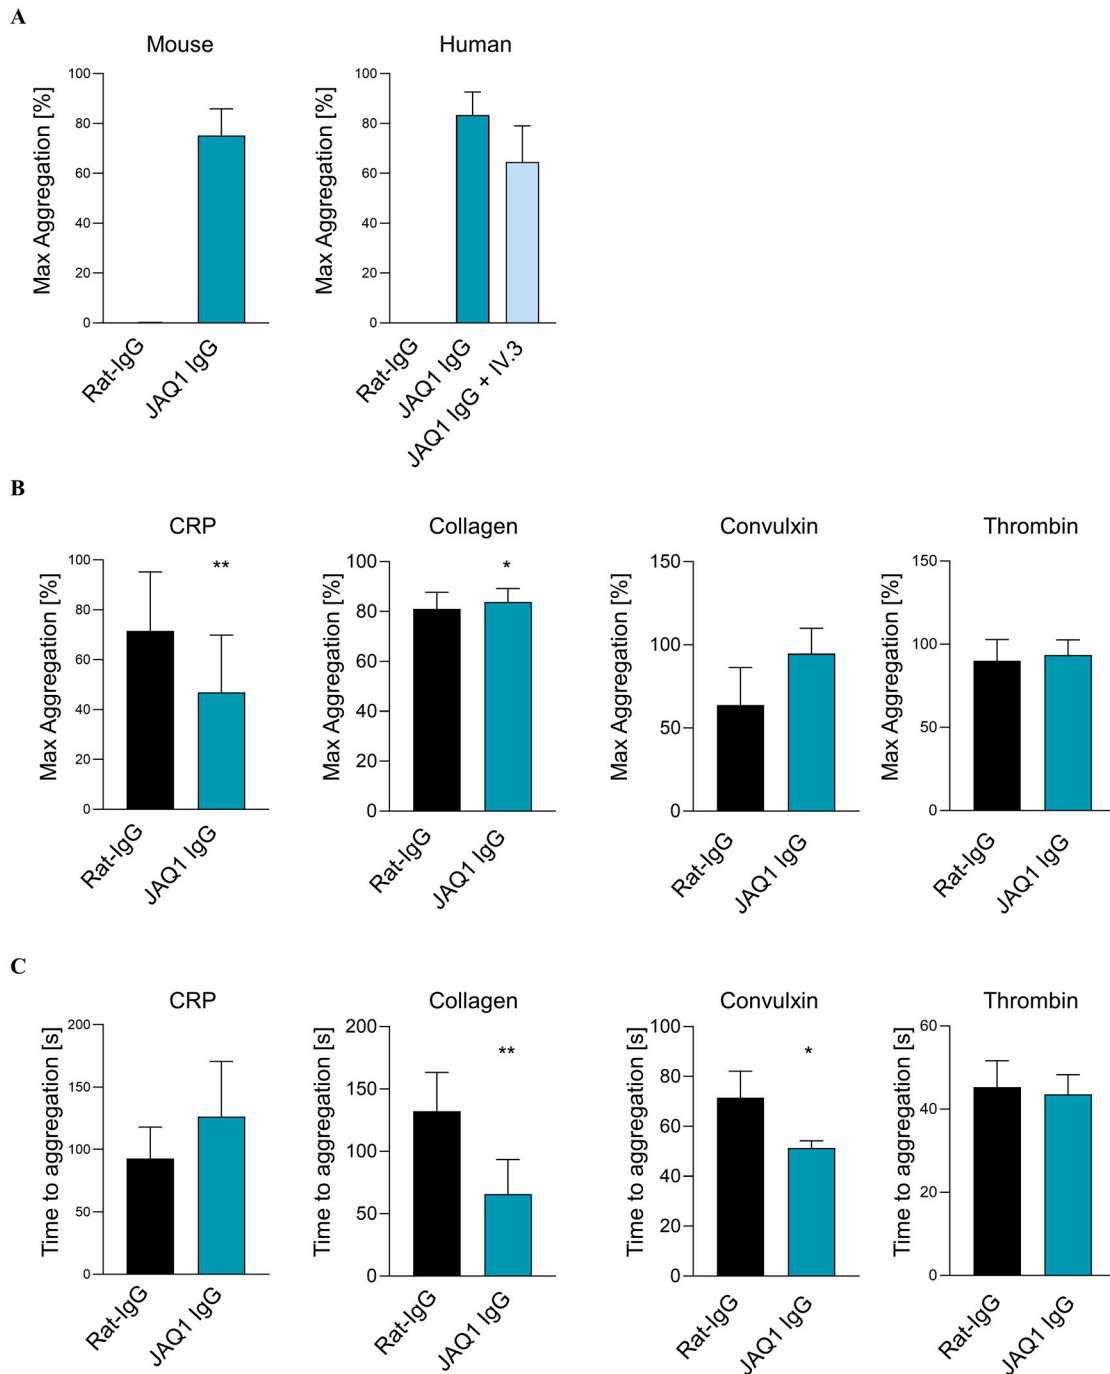

**Suppl. Figure S1 . Anti-mouse GPVI monoclonal antibody JAQ1 binds human GPVI and modulates receptor function.** Analysis of light transmission aggregometry reported as maximal aggregation and time to aggregation (time to begin of aggregate formation). (A) Maximal aggregation relative to Figure 1D. (B-C) Analysis of aggregation curves shown in Figure 1E and reported as maximal aggregation (B) or time to start of aggregate formation (C). Experiments shown are representative of n=4. Data are expressed as means  $\pm$  SD.

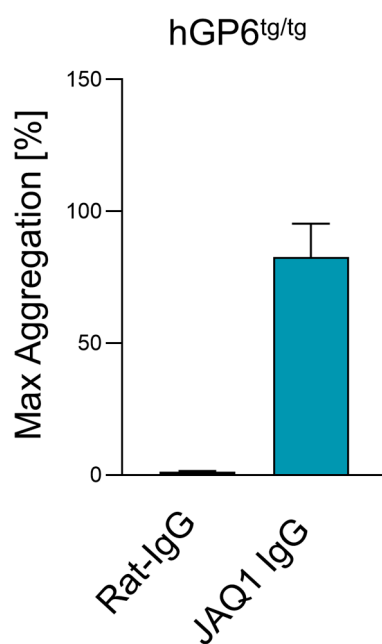

**Suppl. Figure S2 . A humanized GP6 mouse line to study the effect of JAQ1 on huGPVI.** Analysis of light transmission aggregometry shown in Figure 2F and reported as maximal aggregation. Experiments shown are representative of n=4. Data are expressed as means  $\pm$  SD.

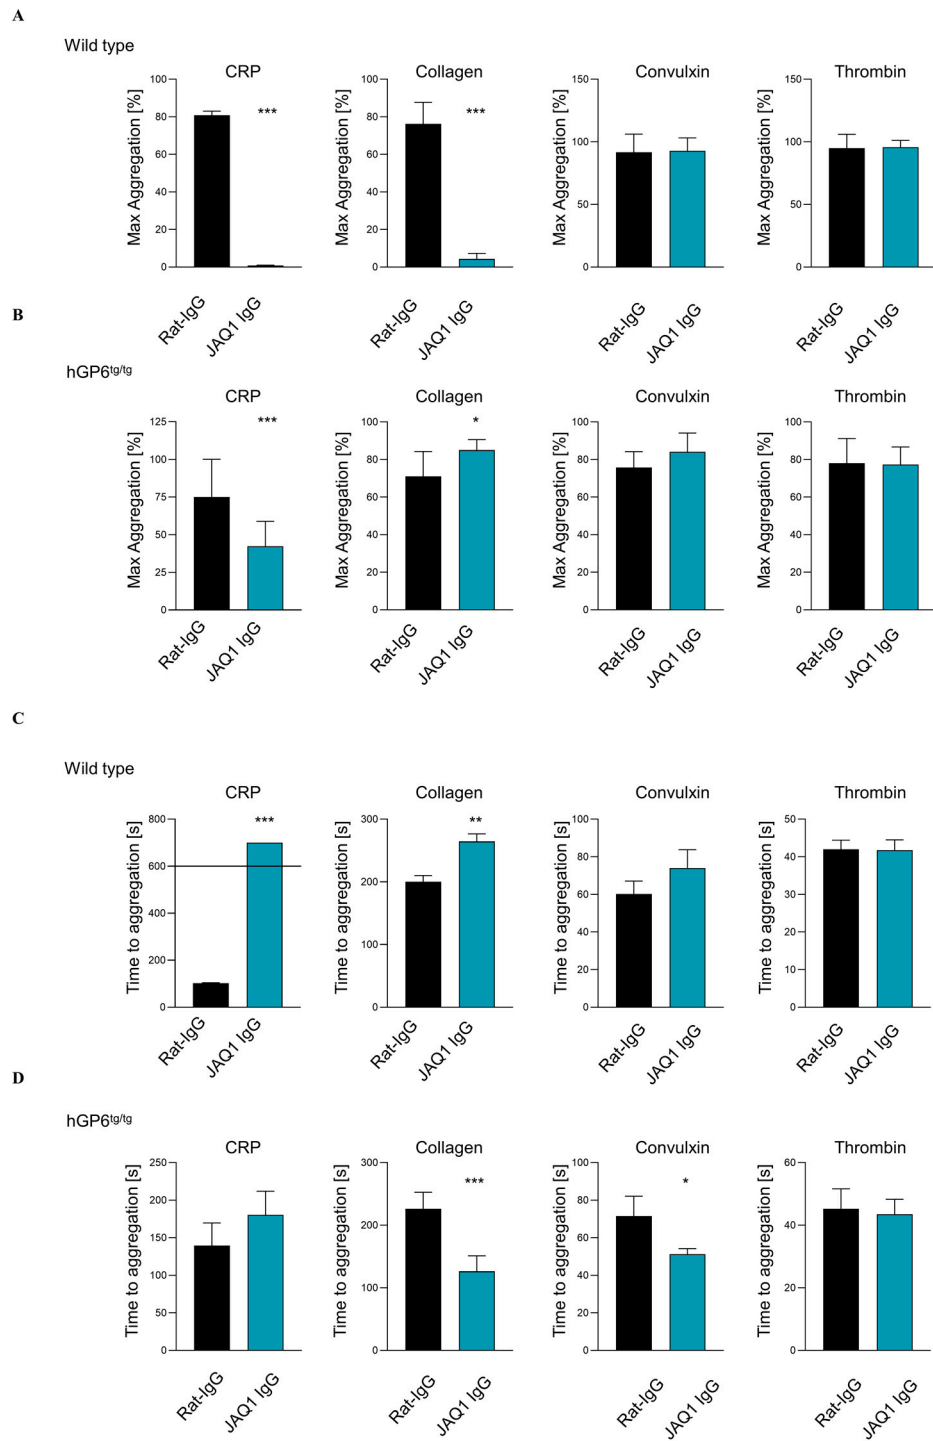

**Suppl. Figure S3 . Differential effect of JAQ1 on huGPVI and mGPVI.** Analysis of light transmission aggregometry reported as maximal aggregation (A-B) and time to aggregation (time to begin of aggregate formation) (C-D). Experiments shown are representative of at n=4. Data are expressed as means  $\pm$  SD.

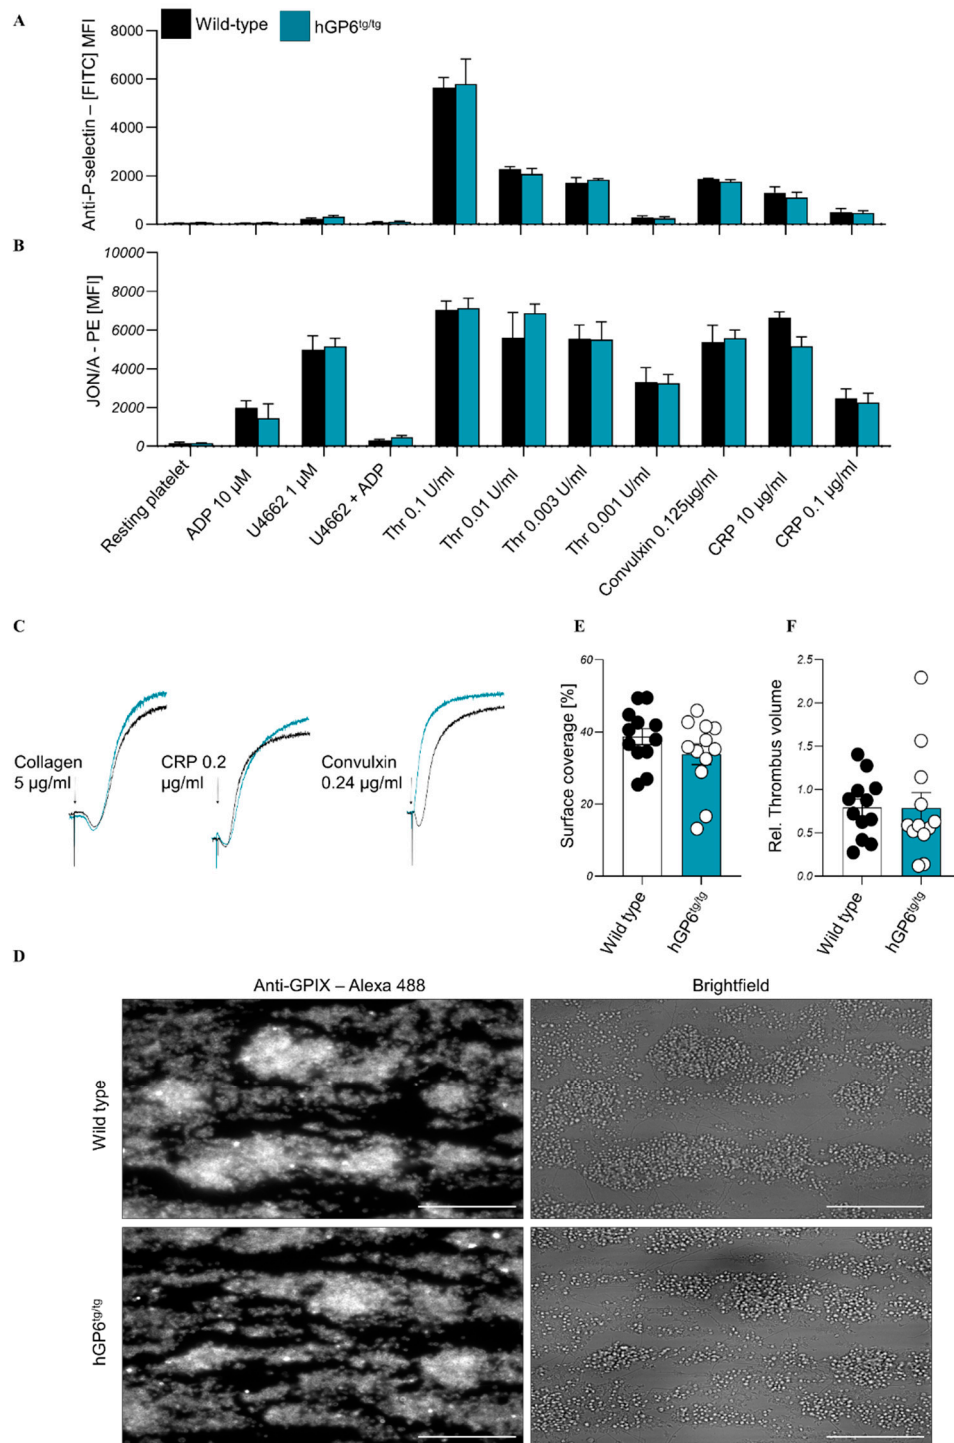

**Suppl. Figure S4 . Differential effect of JAQ1 on huGPVI and mGPVI.** (A-B) Washed WT or *hGP6<sup>tg/tg</sup>* blood was pre-incubated with the indicated agonists or vehicle. Platelet degranulation (a) and integrin  $\alpha$ IIb $\beta$ 3 activation (b) were measured by flow cytometry. (C) Washed platelets from WT or *hGP6<sup>tg/tg</sup>* were tested in standard aggregometry using the indicated agonists; aggregation was measured for 10 min. (D-F) Heparinised WT or *hGP6<sup>tg/tg</sup>* blood was tested in a whole blood flow adhesion assay on a collagen-coated surface. Percentage of the covered surface (E) and relative volume of thrombi (F) was analysed based on fluorescence intensity of anti-GPIX<sup>AF488</sup> derivative. Experiments shown are representative of at least n=4. Flow cytometry data are expressed as means  $\pm$  SD.

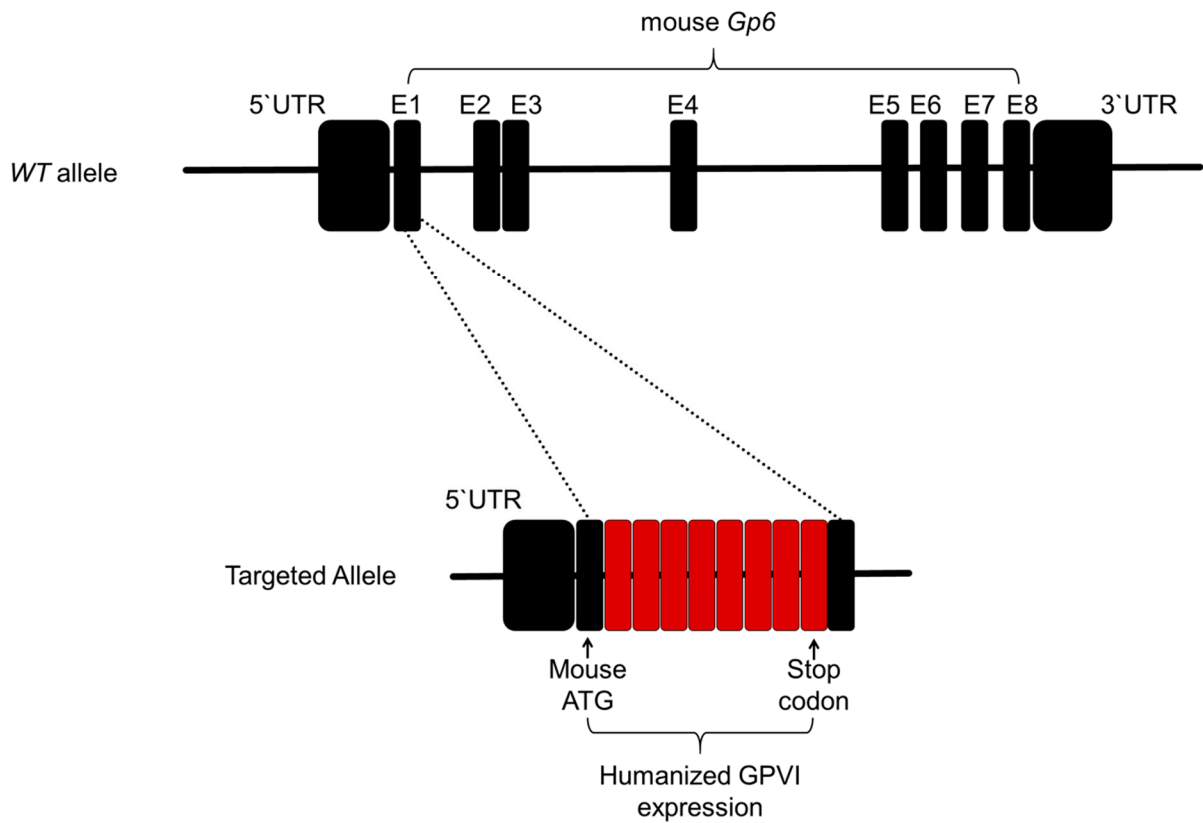

**Suppl. Figure S5.** For the generation of humanized GPVI (*hGP6<sup>tg/tg</sup>*) mice, the cDNA expressing human GPVI (huGPVI) shown in the figure in red, was inserted at the ATG site of the mouse *Gp6* gene (black) via CRISPR-Cas9 technology. Human *GP6* cDNA carries a stop codon thus allowing only selective expression of huGPVI.
